# Supplementary material
Source: publisher figshare collection journal article supplement (https://acs.figshare.com/ndownloader/files/3840400)
Supplement: Supplementary file 1 [file 3840400]

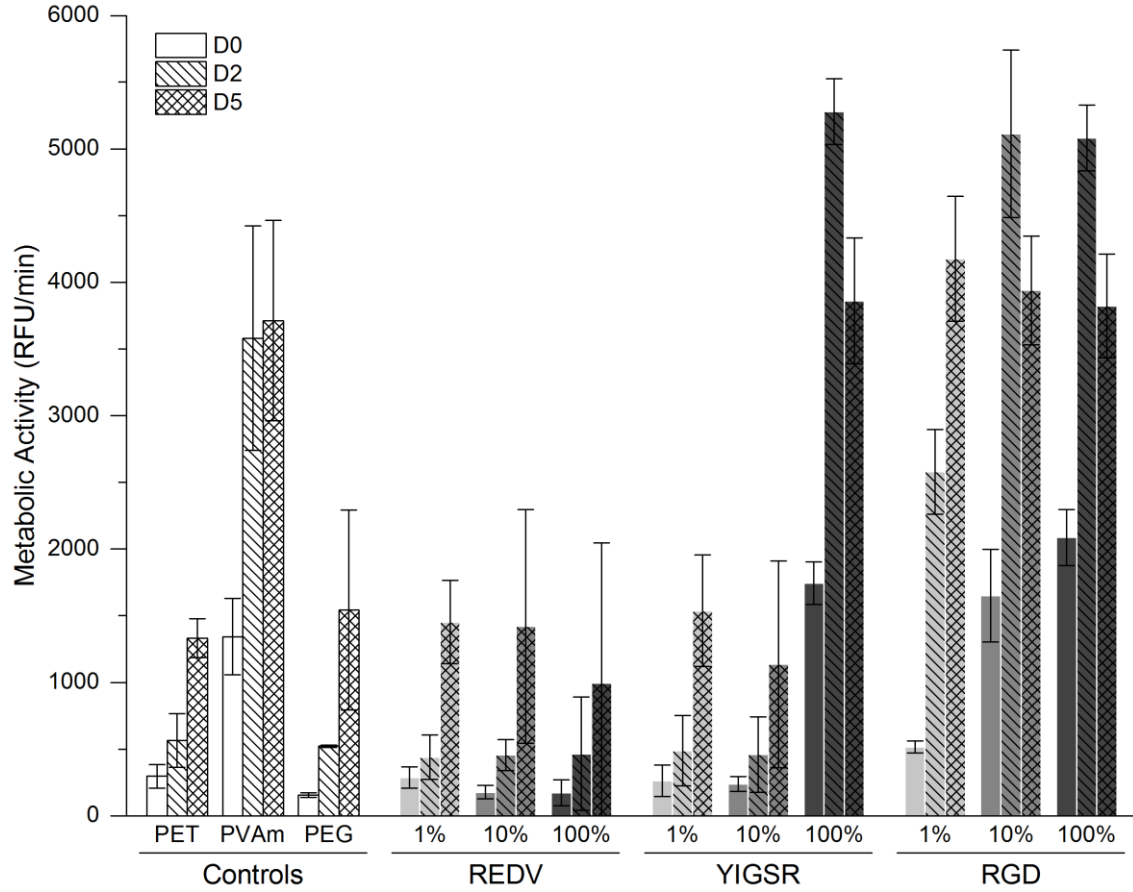

**Figure S1. HUVEC proliferation on peptide-functionalized PET films as determined by resazurin assay.** The latter was performed one hour after HUVEC seeding (D0) and repeated on the same samples after two (D2) and five (D5) days in full medium. The experiment was done once on triplicates. ( $n=3 \times N=1$ )

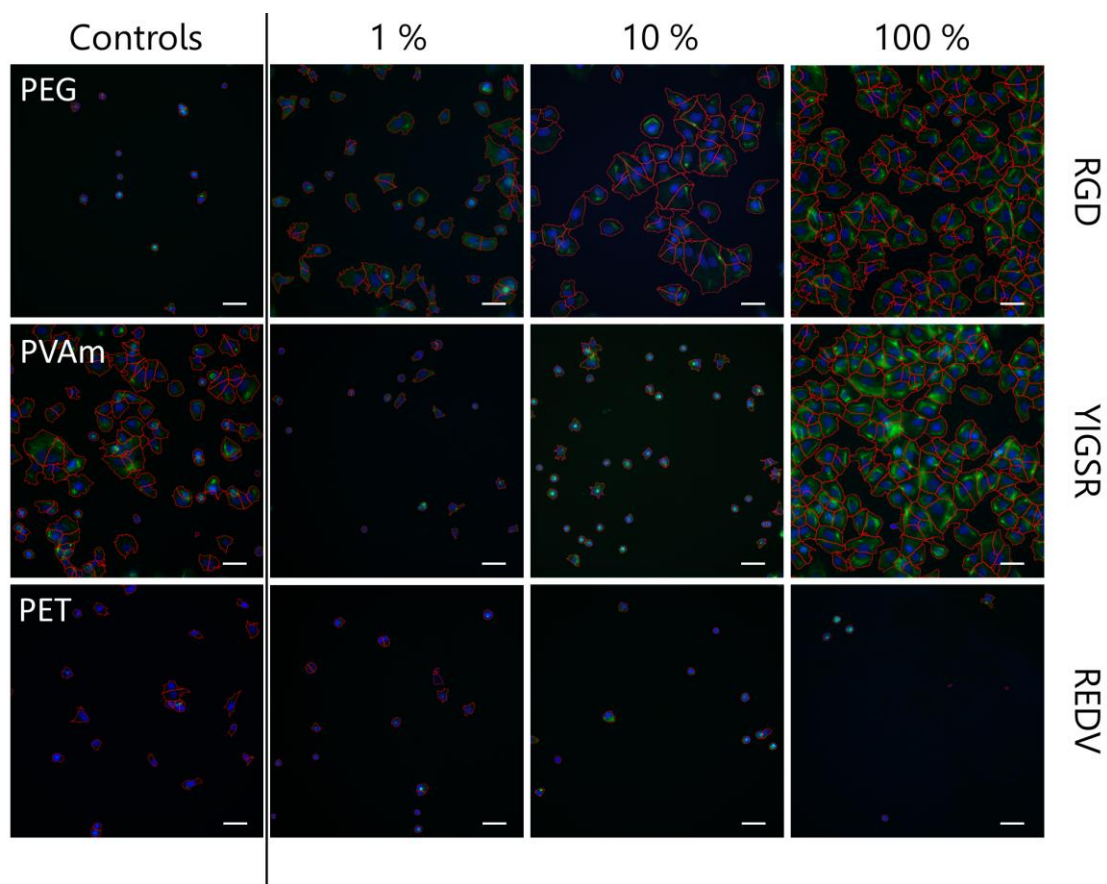

**Figure S2. Examples of images used to generate data from Figure 6.** Nuclei and cells, as identified by the CellProfiler software, are outlined in blue and red, respectively. Scale bars represent 50  $\mu\text{m}$ .

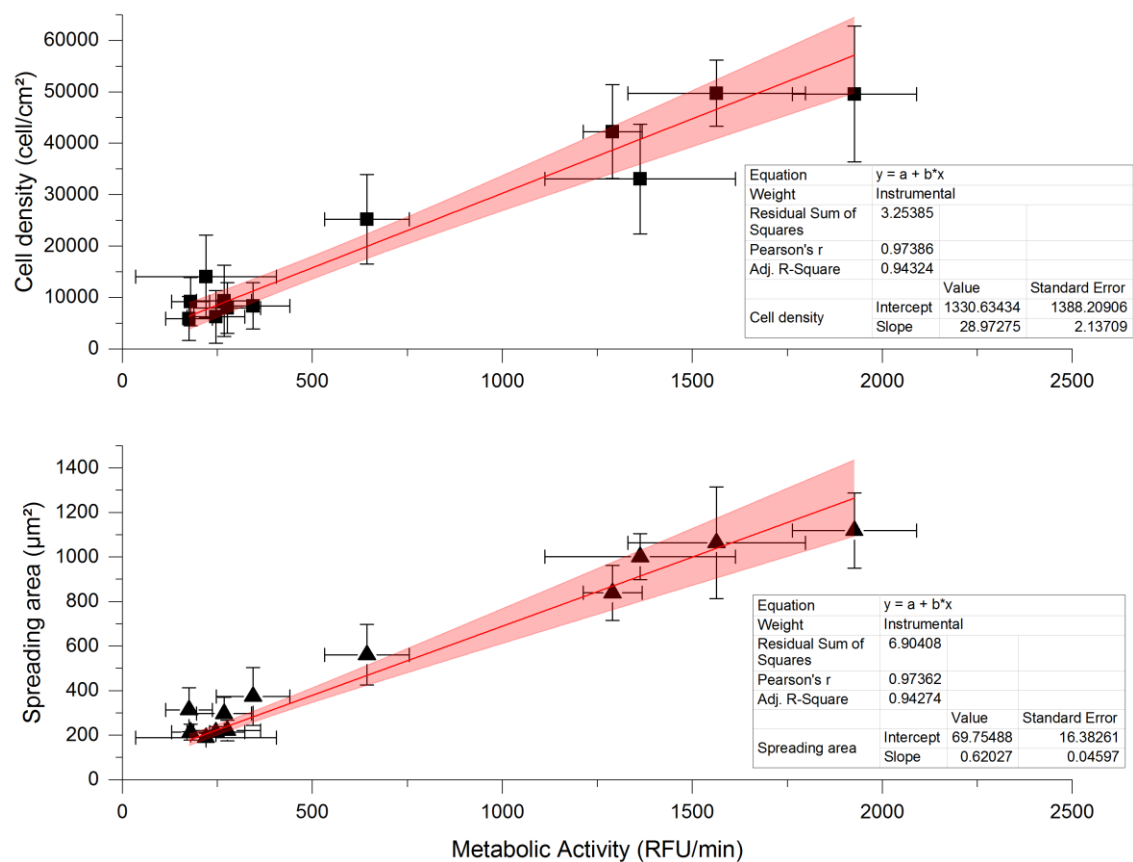

**Figure S3. Comparison of resazurin assay with cell density and spreading area.**

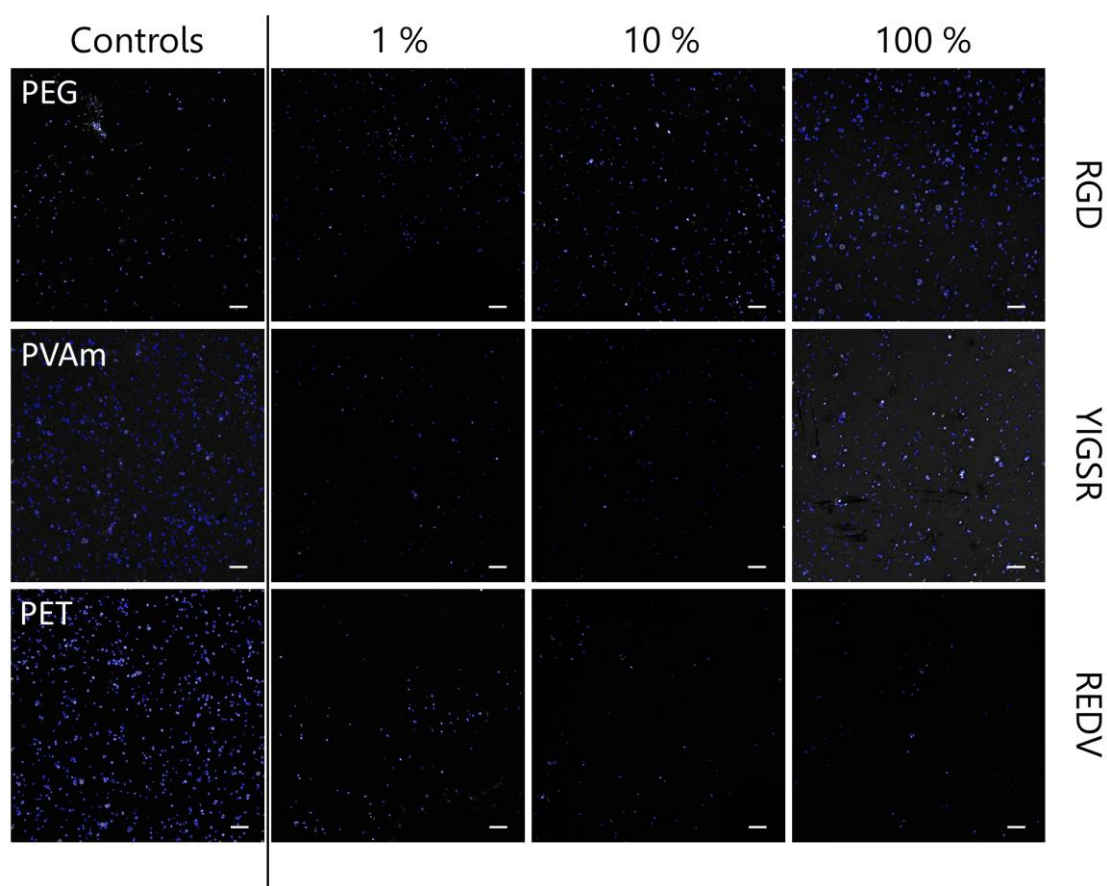

**Figure S4. Examples of images used to generate data from Figure 8.** Platelets, as identified by the Cell Profiler software, are outlined in blue. Scale bars represent 50  $\mu\text{m}$ .
